# Supplementary material for: Diverse modes of galacto-specific carbohydrate recognition by a family 31 glycoside hydrolase from Clostridium perfringens
Source: PubMed Central journal article supplement (PMC5291390; doi:10.1371/journal.pone.0171606), 2017-02-03
Supplement: pone.0171606.s002.pdf [file pone.0171606.s002.pdf]

**S1 Table. X-ray data collection and refinement statistics for the *CpGH31* CBM32s.**

| Data collection statistics          | CBM32-1 (apo)          | CBM32-2 (GalNAc)       | CBM32-3 (apo)          | CBM32-3 (galactose)    | CBM32-3 (GalNAc)       |
|-------------------------------------|------------------------|------------------------|------------------------|------------------------|------------------------|
| Wavelength (Å)                      | 1.033                  | 0.979                  | 1.055                  | 0.98                   | 0.98                   |
| Beamline                            | APS 23-ID-B            | CLS 08B1-1             | NSLS X6A               | NSLS X6A               | SSRL 14-1              |
| Space group                         | $C222_1$               | $P22_12_1$             | $P2_12_12_1$           | $P4_32_12$             | $P4_32_12$             |
| Resolution range                    | 30.00-1.35 (1.40-1.35) | 38.41-2.00 (2.05-2.00) | 50.00-1.58 (1.64-1.58) | 50.00-1.48 (1.53-1.48) | 42.89-2.50 (2.60-2.50) |
| Cell dimension                      | 55.62, 55.67, 88.70    | 48.30, 84.75, 86.17    | 38.76, 52.56, 70.17    | 62.33, 62.33, 85.35    | 60.549, 50.549, 83.69  |
| $\alpha, \beta, \gamma$ , (°)       | 90.00, 90.00, 90.00    | 90.00, 90.00, 90.00    | 90.00, 90.00, 90.00    | 90.00, 90.00, 90.00    | 90.00, 90.00, 90.00    |
| $R_{meas}$                          | 0.063 (0.45)           | 0.16 (0.52)            | 0.042 (0.084)          | 0.057 (0.38)           | 0.114 (0.513)          |
| Completeness (%)                    | 98.9 (97.7)            | 99.9 (100)             | 98.9 (91.0)            | 99.9 (99.2)            | 100.0 (100.0)          |
| $\langle I/\sigma I \rangle$        | 23.8 (4.2)             | 13.7 (7.8)             | 34.7 (26.6)            | 31.5 (6.3)             | 14.3 (3.8)             |
| Redundancy                          | 5.7 (5.1)              | 14.0 (14.1)            | 7.8 (7.6)              | 8.4 (8.0)              | 6.0 (6.2)              |
| Total reflections                   | 171557                 | 345760                 | 157870                 | 242452                 | 35305                  |
| Unique reflections                  | 30335                  | 24623                  | 20155                  | 28797                  | 5836                   |
| <b>Refinement statistics</b>        |                        |                        |                        |                        |                        |
| $R_{work}$ (%)                      | 18.9                   | 19.2                   | 16.1                   | 17.6                   | 17.4                   |
| $R_{free}$ (%)                      | 20.7                   | 22.1                   | 19.4                   | 20.2                   | 22.1                   |
| r.m.s.d.                            |                        |                        |                        |                        |                        |
| Bond lengths (Å)                    | 0.006                  | 0.020                  | 0.024                  | 0.006                  | 0.007                  |
| Bond angles (°)                     | 1.066                  | 1.928                  | 2.248                  | 1.042                  | 1.016                  |
| Average B-factors (Å <sup>2</sup> ) |                        |                        |                        |                        |                        |
| Protein atoms chain A               | 15.471                 | 14.906                 | 8.266                  | 14.436                 | 28.966                 |
| Protein atoms chain C               | -                      | 16.384                 | -                      | -                      | -                      |
| Water molecules                     | 23.924                 | 26.716                 | 20.399                 | 26.655                 | 34.197                 |
| Ligand                              | -                      | 30.178                 | -                      | 28.518                 | 44.594                 |
| Cations                             | 10.335                 | 8.660                  | 9.189                  | 15.400                 | 39.150                 |
| Number of atoms                     |                        |                        |                        |                        |                        |
| Protein atoms chain A               | 1152                   | 1175                   | 1277                   | 1257                   | 1235                   |
| Protein atoms chain C               | -                      | 1156                   | -                      | -                      | -                      |
| Water molecules                     | 114                    | 352                    | 193                    | 229                    | 52                     |
| Ligand                              | -                      | 50                     | -                      | 24                     | 30                     |
| Cations                             | 2                      | 2                      | 2                      | 1                      | 1                      |
| Ramachandran statistics             |                        |                        |                        |                        |                        |
| Most favoured (%)                   | 97.1                   | 98.0                   | 98.1                   | 96.9                   | 96.8                   |
| Additional allowed (%)              | 2.9                    | 2.0                    | 1.9                    | 3.1                    | 3.2                    |
| Disallowed (%)                      | 0.0                    | 0.0                    | 0.0                    | 0.0                    | 0.0                    |
| Protein Data Bank code              | 4LPL                   | 4UAP                   | 4LQR                   | 4LKL                   | 4P5Y                   |

\*Numbers in brackets refer to values from the highest resolution shell
